# Supplementary material for: Dense fibrillar collagen is a potent inducer of invadopodia via a specific signaling network
Source: PubMed Central journal article supplement — J Cell Biol. 2015 Feb 2;208(3):331–50. doi: 10.1083/jcb.201405099 (PMC4315243; doi:10.1083/jcb.201405099), 2015-02-02
Supplement: supp_jcb.201405099_JCB_201405099_sm.pdf [file supp_jcb.201405099_JCB_201405099_sm.pdf]

Artym et al., <http://www.jcb.org/cgi/content/full/jcb.201405099/DC1>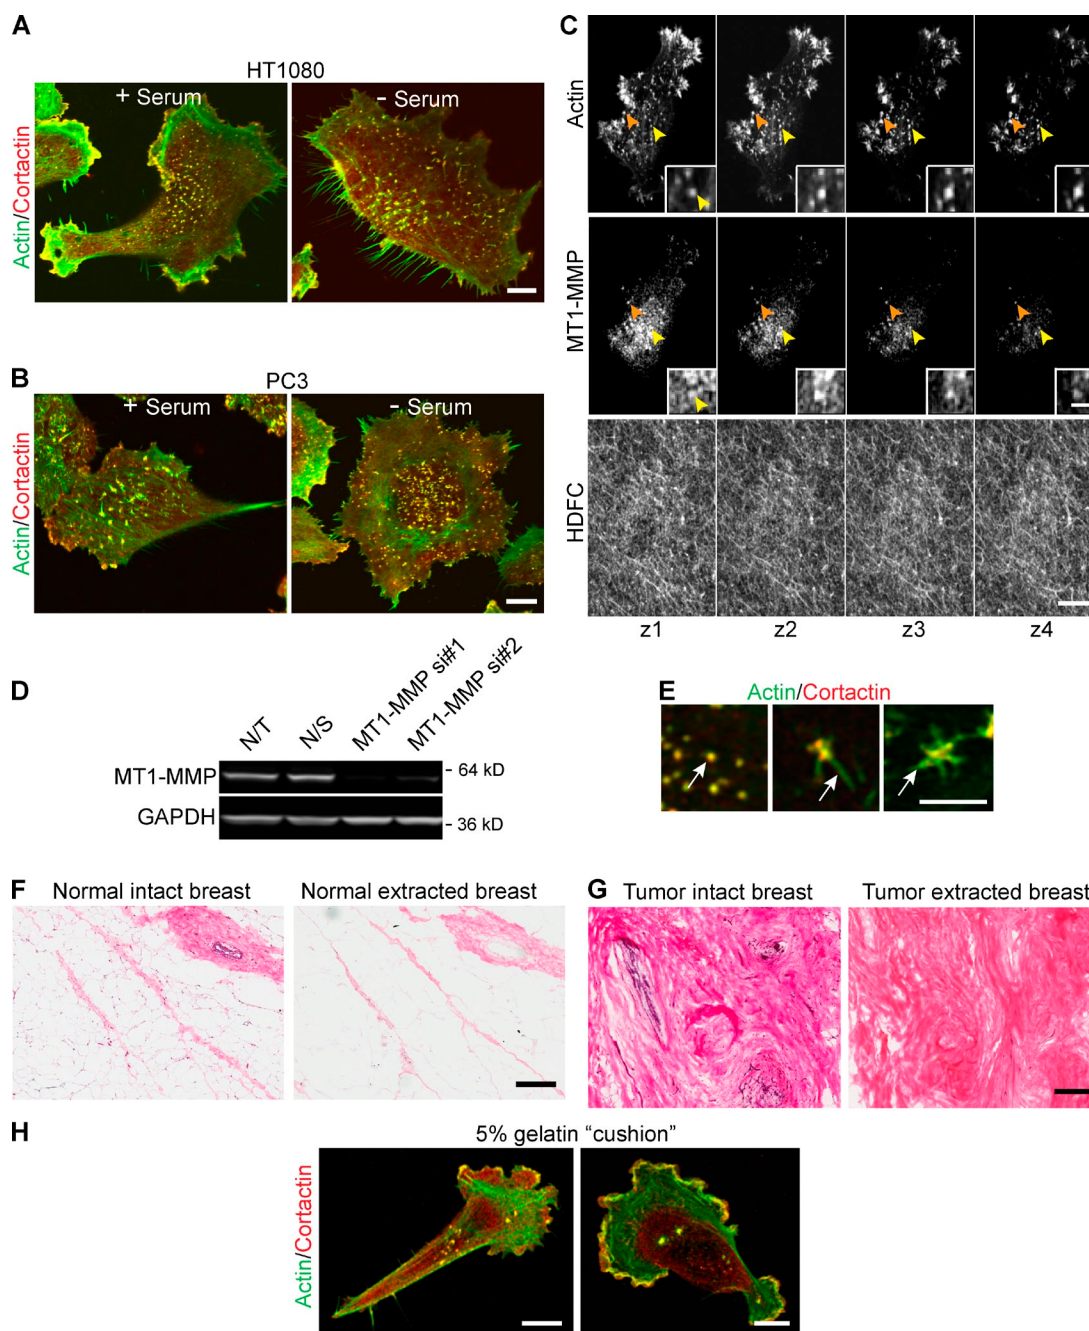

**Figure S1. HDFC is a potent inducer of invadopodia.** (A) HDFC induces abundant invadopodia in HT-1080 cells regardless of the presence or absence of serum in culture media. (B) HDFC induces abundant invadopodia in PC3 cells independent of serum. (C) Consecutive confocal z planes of MDA-MB-231 cells invading fluorescently labeled HDFC matrix. Invadopodia are visualized as aggregates of colocized actin and MT1-MMP penetrating deep into HDFC matrix. Arrowheads track individual invadopodia through consecutive z planes. Insets provide magnified views of invadopodia. (D) Representative Western blot of MT1-MMP knockdown with independent single duplex MT1-MMP-specific siRNA (si#1 and si#2). Control conditions: mock-transfected cells (not transfected [N/T]) and cells transfected with nonspecific control siRNA (N/S). (E) Representative morphologies of invadopodia of MDA-MB-231 cells invading HDFC. Arrows point to the filament-like extensions emanating from the actin/cortactin-rich cores of invadopodia. (F) H&E staining of intact or acellular normal breast tissue cryostat sections. (G) H&E staining of intact or acellular malignant breast tissue cryostat sections. (H) Immunostaining of MDA-MB-231 cells for actin and cortactin to identify actin/cortactin-rich invadopodia (yellow dots). Cells were allowed to invade into a 5% gelatin "cushion" for 3 h. Bars: [A–C [main images] and H] 10  $\mu$ m; [C, insets] 2  $\mu$ m; [E] 5  $\mu$ m; [F and G] 300  $\mu$ m.

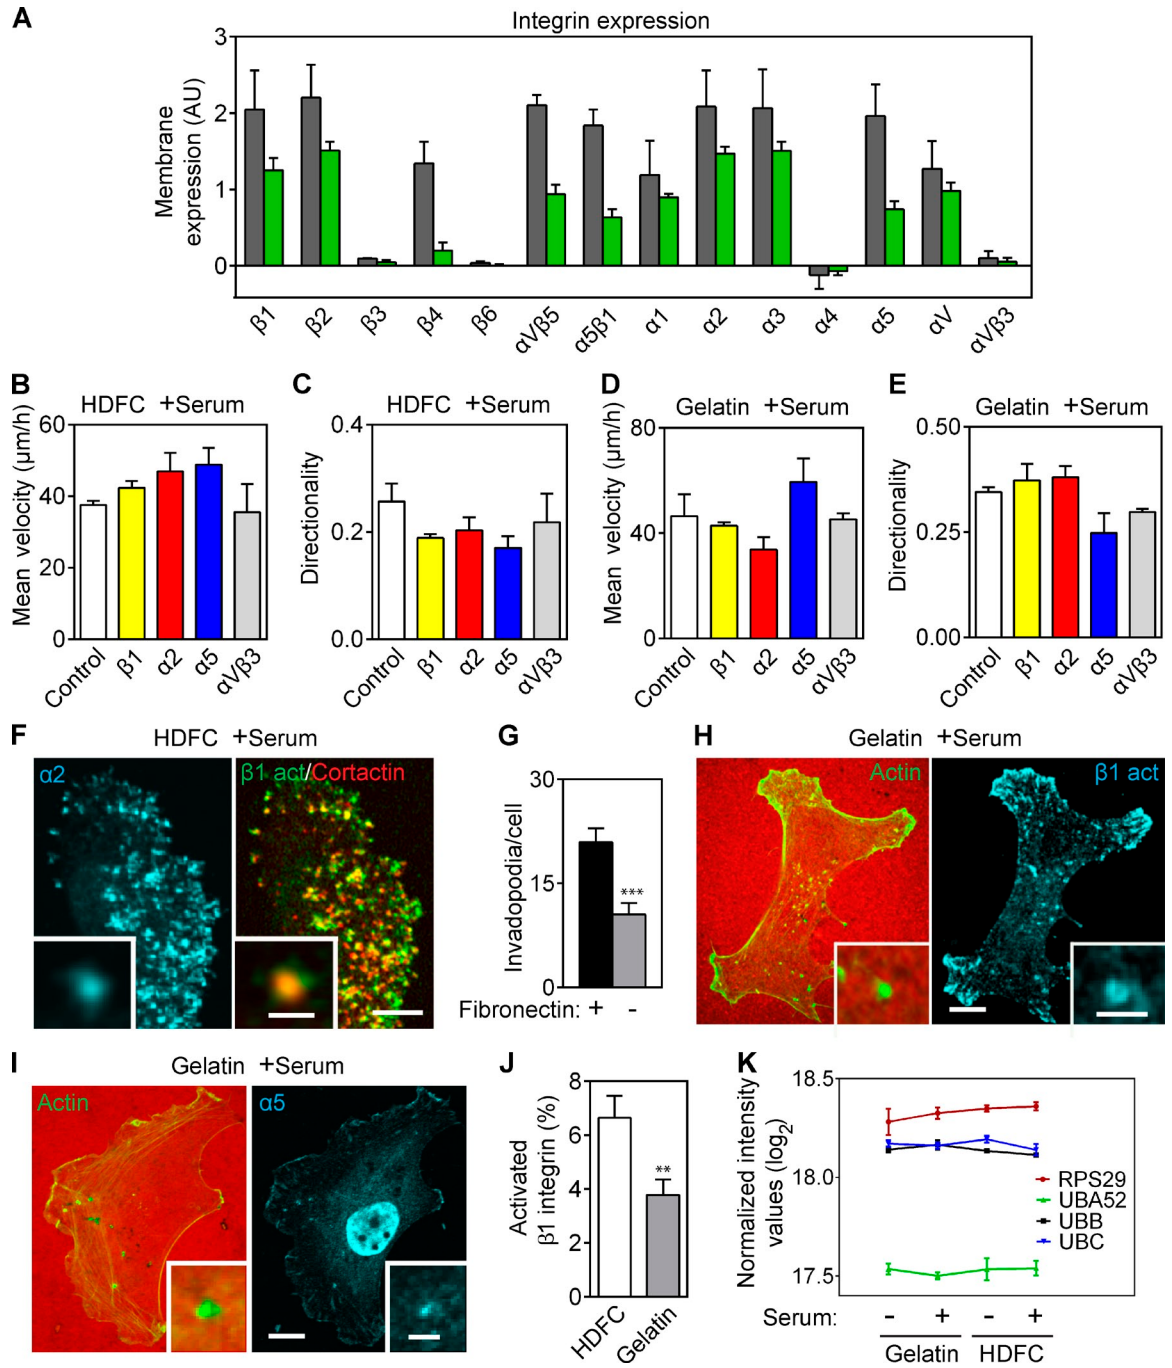

**Figure S2. Integrins and invadopodia formation.** (A) Cell surface integrin profiling of parental (gray) and wild-type c-Src-expressing (green) MDA-MB-231 cells as determined by  $\alpha$  and  $\beta$  integrin-mediated cell adhesion arrays (EMD Millipore). In these assays, microtiter plates precoated with mouse mAbs against individual human  $\alpha$  and  $\beta$  integrin subunits were used to capture cells expressing these integrins on their cell surface. Cells adhering to the microtiter plates were fixed and stained, and relative cell attachment was determined using absorbance spectrophotometry. Means  $\pm$  SEM from three independent experiments. AU, arbitrary unit. (B) Minimal effect of integrin inhibition on velocity of MDA-MB-231 carcinoma cells migrating on HDFC matrix in serum-containing media. The values are means  $\pm$  SEM of 30 cells from each of three independent experiments (i.e., a total of 90 cells for each condition). (C) Minimal effect of integrin inhibition on directionality of MDA-MB-231 carcinoma cells migrating on HDFC matrix in serum-containing media showing means  $\pm$  SEM of 30 cells from each of three independent experiments (total of 90 cells/condition). (D) Minimal effect of integrin inhibition on velocity of MDA-MB-231 cells migrating on gelatin matrix in serum-containing media. The values are means  $\pm$  SEM of 30 cells from each of three independent experiments. (E) Minimal effect of integrin inhibition on directionality of MDA-MB-231 cells migrating on gelatin matrix in serum-containing media. The values are means  $\pm$  SEM of 30 cells/repeat, three independent repeats. (F) Immunolocalization of  $\alpha 2$  and activated  $\beta 1$  integrins ( $\beta 1$  act) to invadopodia of MDA-MB-231 cells invading HDFC. Insets show magnified individual invadopodia. (G) Effect of fibronectin depletion from serum on the invadopodia formation wild-type c-Src-overexpressing MDA-MB-231 cells. Full-length fibronectin was removed from the fetal bovine serum by passing it through gelatin-Sepharose column. Cells were incubated overnight on gelatin matrix in culture medium supplemented with fibronectin-depleted serum. Invadopodia were quantified as actin/cortactin aggregates. 19 cells were examined for each condition. The values are means  $\pm$  SEM. (H) Localization of activated  $\beta 1$  integrin to invadopodia of MDA-MB-231 cells invading gelatin matrix in serum-containing medium. Insets provide magnified views of invadopodia. (I) Localization of endogenous  $\alpha 5$  integrin to invadopodia of MDA-MB-231 cells invading gelatin. Insets show enlarged views of invadopodia. (J) Quantification of activated  $\beta 1$  integrin on cells adherent to HDFC or gelatin. The values indicate the percentage of the total ventral cell membrane positive for activated  $\beta 1$  integrin  $\pm$  SEM based on 20 cells/condition. (K) Expression of control genes (RPS29, UBB, UBA52, and UBC) for the microarray assays using Agilent 4  $\times$  44K Whole Human Genome microarray chips. Means  $\pm$  SEM value of normalized intensity from five independent experiments. \*\*,  $P < 0.001$ ; \*\*\*,  $P < 0.0001$ . Bars: (F, H, and I, main images) 10  $\mu\text{m}$ ; (F, H, and I, insets) 2  $\mu\text{m}$ .

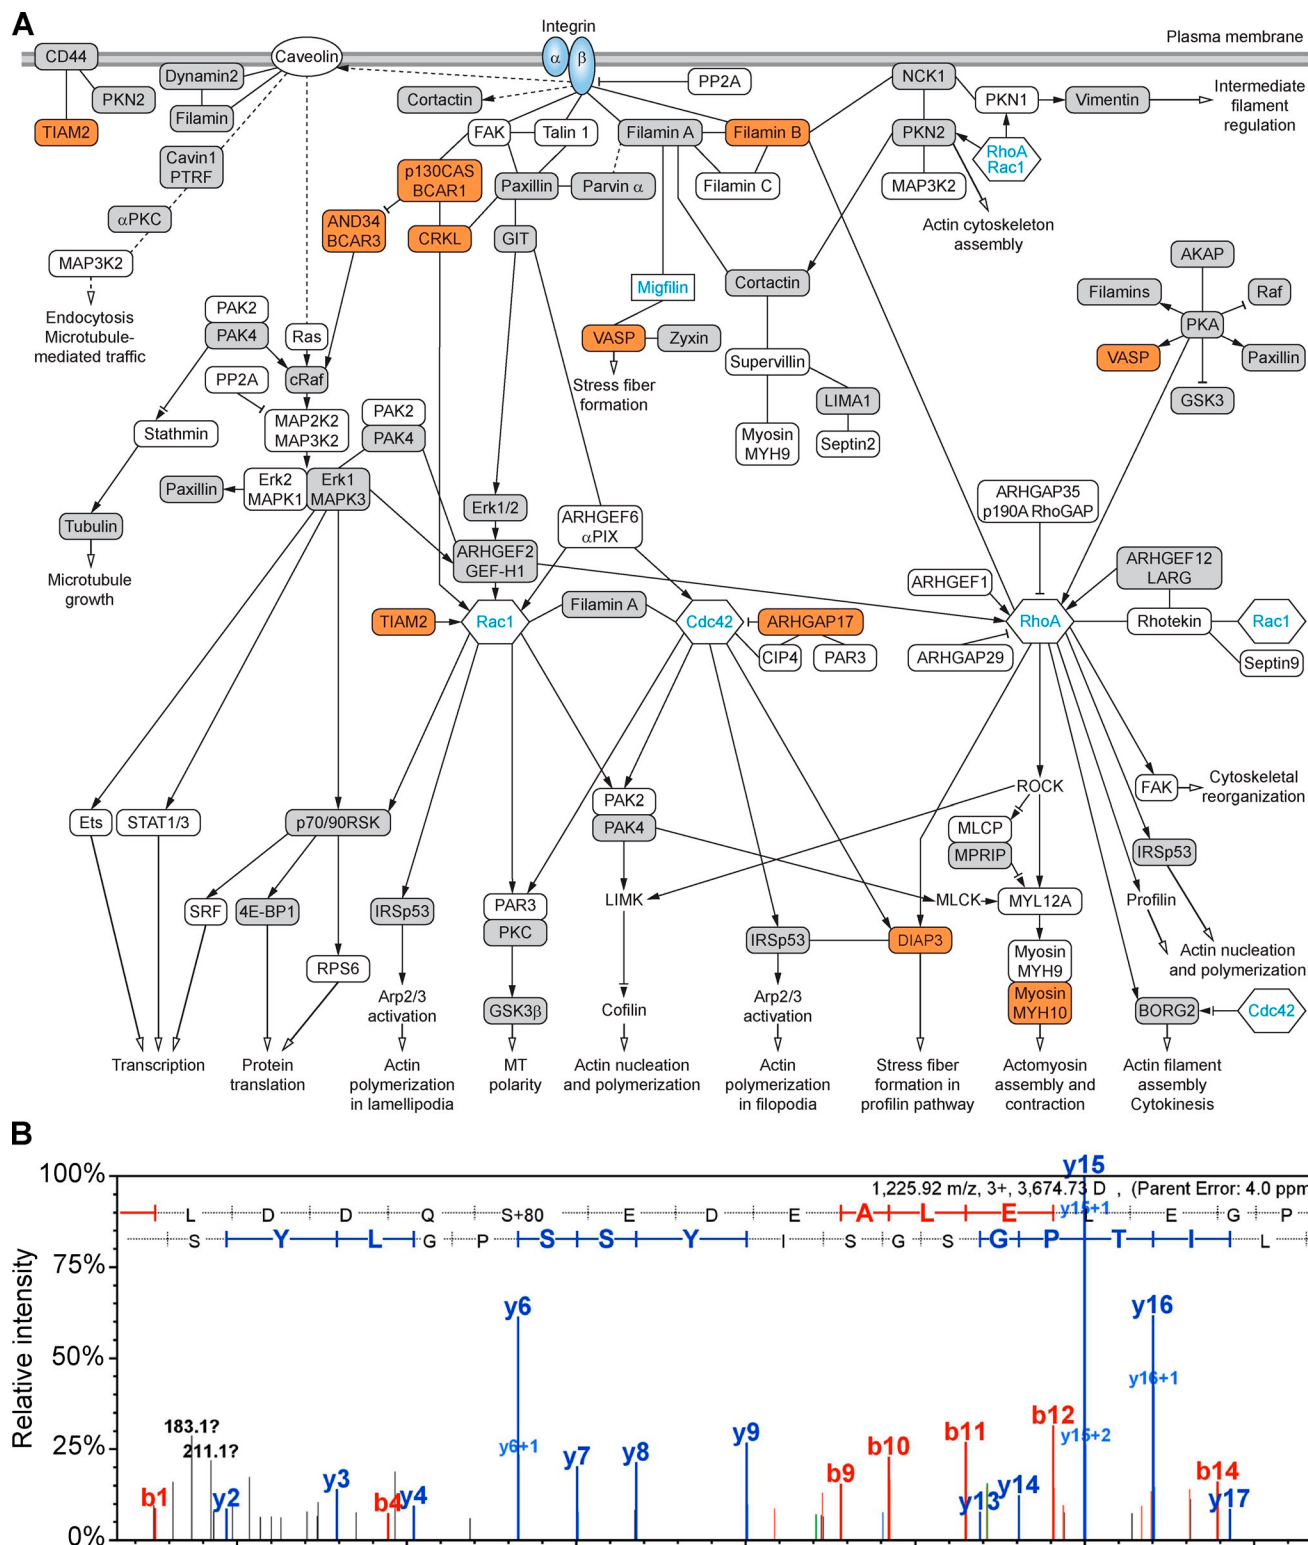

**Figure S3. Phosphoproteomics analysis of cells adherent to gelatin matrix reveals complex downstream signaling network.** (A) White boxes indicate phosphoproteins identified in both HDFC and gelatin samples that have the same phosphorylation sites. Gray boxes denote phosphoproteins identified in both HDFC and gelatin samples that have different phosphorylation sites on the two different matrices. Orange boxes indicate phosphoproteins unique to gelatin matrix. Certain proteins without phosphorylation changes, including Rac1, Cdc42, RhoA,  $\alpha\beta$  integrin, and migfilin, have been inserted to clarify the signaling context of the proteins identified by phosphoproteomics. Solid lines indicate known direct physical binding between proteins. Dotted lines indicate indirect interactions involving intermediate partners. A black arrow at the end of a line indicates that a protein is known to stimulate the downstream signaling partner, lines with inhibition symbol indicate down-regulation of activity of the downstream signaling partner, lines with inhibition symbol plus a black arrow indicates both potential activation and inhibition, and open arrows denote stimulation of the cellular process. Abbreviations used in the signaling network diagram: VASP, vasodilator-stimulated phosphoprotein; CRKL, v-crk sarcoma virus CT10 oncogene homologue (avian)-like; GIT, G protein-coupled receptor kinase interacting ArfGAP 1; LARG, leukemia-associated Rho GEF. (B) MS/MS spectrum of the triply charged phosphopeptide, KLDDQSPDEALEGLPLTPGSGSIYSSPGLYSK, from kindlin2 at  $m/z = 1,225.92$  (bold indicates phosphorylated serine). The spectrum was obtained from the analysis of the phosphopeptide enriched tryptic digest derived from cells grown on HDFC matrix. Matched b- and y-ion fragments are highlighted in red and blue, respectively. Observation of the b9–12, 14, and 30 ions provides evidence for the localization of the phosphorylation on S159. The peptide was identified with a MASCOT identity score of 61.4. This phosphopeptide was not identified in samples derived from cells grown on a 2D gelatin matrix.

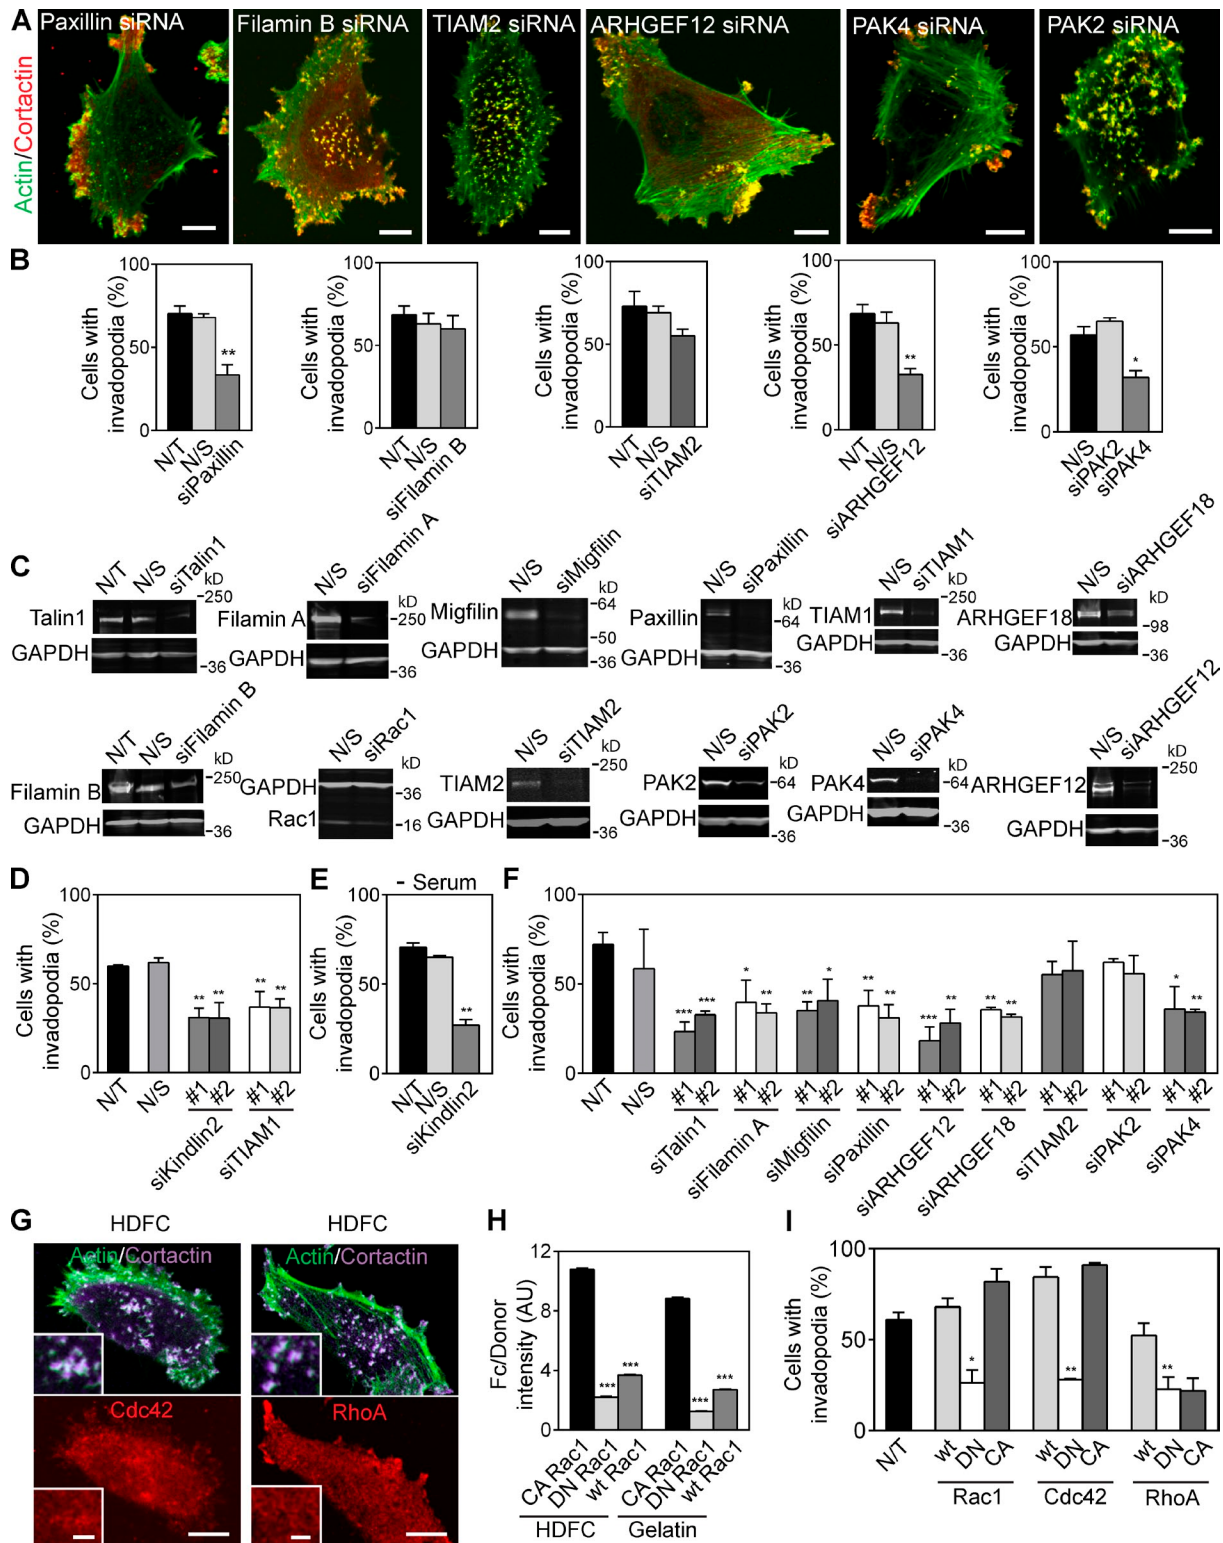

**Figure S4. Complex signaling network of multiple cellular proteins is required for invadopodia formation on HDFC.** (A) Representative immunofluorescence images of MDA-MB-231 cells invading HDFC after depletion of paxillin, filamin B, TIAM2, ARHGEF12, PAK4, or PAK2 using specific siRNA pools. (B) Quantitative evaluation of effects of specific protein knockdown in A on invadopodia formation in MDA-MB-231 cells. Means  $\pm$  SEM of  $\sim$ 100 cells from three independent experiments. (C) Representative Western blots for specific protein knockdown in A and B and in Fig. 5 (F–I, L, M, Q, and R). (D) Quantitative evaluation of protein knockdown on invadopodia formation in MDA-MB-231 cells using single duplex siRNA specific to kindlin2 and TIAM1. Values are means  $\pm$  SEM of  $\sim$ 100 cells/condition with three repeats. (E) Quantitative evaluation of kindlin2 down-regulation by siRNA pool on invadopodia formation on HDFC at the absence of serum. Values are means  $\pm$  SEM of  $\sim$ 100 cells/condition with two repeats. (F) Quantitative evaluation of protein knockdown on invadopodia formation in MDA-MB-231 cells using independent single duplex siRNAs specific to talin1, filamin A, migfilin, paxillin, ARHGEF12 and 18, TIAM2, PAK2, and PAK4. Values are means  $\pm$  SEM of  $\sim$ 100 cells/condition with three repeats. (G) Immunostaining of endogenous Cdc42 and RhoA in MDA-MB-231 cells invading HDFC. Insets show magnified views of invadopodia. (H) FRET efficiency of Rac1 biosensor for constitutively active (CA Rac1), dominant-negative (DN Rac1), and wild-type (wt Rac1) forms of the Rac1 biosensor. AU, arbitrary unit. (I) Effect of overexpression of wild-type (wt) small GTPases Rac1, Cdc42, RhoA, and their dominant-negative (DN) or constitutively active (CA) mutants on invadopodia formation in carcinoma cells invading HDFC. The values are mean percentages of cells with invadopodia  $\pm$  SEM of 100 cells/repeat with three independent repeats (300 cells total). N/S, nonspecific; N/T, nontransfected. \*,  $P < 0.05$ ; \*\*,  $P < 0.001$ ; \*\*\*,  $P < 0.0001$ . Bars: (A and G, main images) 10  $\mu$ m; (G, insets) 2  $\mu$ m.

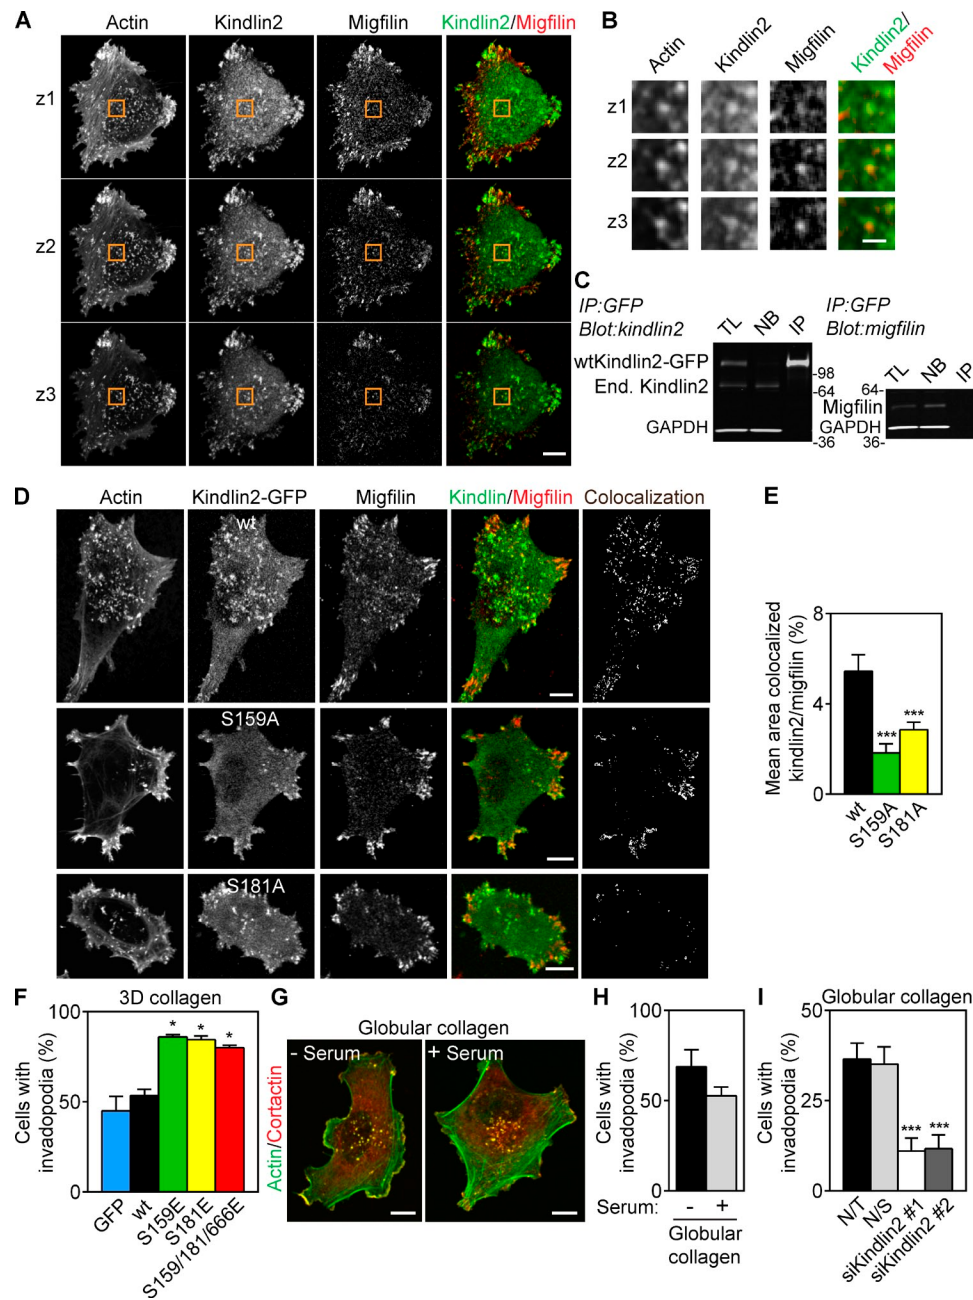

**Figure S5. Kindlin2 phosphorylation regulates invadopodia formation in MDA-MB-231 cells on collagen matrices.** (A) Consecutive confocal z planes of the cell membrane adherent to HDFC matrix. Breast carcinoma MDA-MB-231 cells were cultured on HDFC matrix for 3 h, fixed, and immunolabeled for endogenous kindlin2, migfilin, and actin. Colocalization of kindlin2 and migfilin was detected as appearance of yellow color in kindlin2/migfilin overlay panel. (B) Magnified view of the boxed areas in A. (C) Representative Western blot of kindlin2 and migfilin coimmunoprecipitation (IP). Coimmunoprecipitation of exogenously expressed wild-type (wt) kindlin2-GFP and endogenous migfilin from cell lysates of MDA-MB-231 cells invading HDFC. The following protein fractions were loaded on the gels: TL, total cell lysate of MDA-MB-231 cells obtained from the cell lysis with RIPA lysis buffer; NB, not bound to immunoprecipitation beads fraction of the cell lysate; IP, immunoprecipitation fraction collected as eluent of the proteins bound to the immunoprecipitation beads. Blot on the left represents immunoprecipitation of GFP that was blotted for kindlin2 and GAPDH. Blot on the right represents IP of GFP blotted for migfilin and GAPDH. Molecular markers are in kilobases. Similar results for kindlin2-GFP and migfilin were obtained for other immunoprecipitation protocols listed in Materials and methods section and Western blot images were deposited to DataViewer database of JCB. (D) Confocal images of MDA-MB-231 cells expressing wild-type kindlin2-GFP or kindlin2-GFP mutants S159A or S181A. Cells overexpressing kindlin2-GFP constructs were incubated on HDFC for 3 h, fixed, and immunolabeled for endogenous migfilin and actin. Colocalization image is a binary (black and white) representation of a yellow color corresponding to colocalized kindlin2-GFP and migfilin in kindlin2-migfilin overlay images. (E) Quantification of colocalization of kindlin2-GFP and endogenous migfilin as measured by confocal microscopy in D. Data are the mean area of the kindlin2-GFP/migfilin colocalization normalized to the total area of the cell  $\pm$  SEM from 10–20 cells/condition. (F) Effect of expression of kindlin2 phosphomimetic mutants on invadopodia formation in MDA-MB-231 cells invading thin 3D collagen matrix polymerized at 1.3 mg/ml concentration. Cells were cultured on 3D collagen in the absence of serum. Means  $\pm$  SEM of  $\sim$ 100 cells/condition with two repeats. (G) Representative images of MDA-MB-231 carcinoma cells cultured on globular collagen in the absence or presence of serum. Invadopodia are visualized as yellow aggregates of colocalized actin and cortactin. (H) Quantification of invadopodia-positive cells in G. The values are mean percent of cells with invadopodia  $\pm$  SEM of 90–100 cells/repeat with two to three independent repeats. (I) Quantitative evaluation of the effects of protein knockdown on invadopodia formation in MDA-MB-231 cells using independent single duplex siRNAs specific to kindlin2. Controls are mock transfection (not transfected [N/T]) and cell transfection with nonspecific single duplex siRNA (N/S). The effect of kindlin2 depletion was assayed on cells invading globular collagen matrix. Values are means  $\pm$  SEM of  $\sim$ 100 cells/condition with three repeats. \*,  $P < 0.05$ ; \*\*\*,  $P < 0.0001$ . Bars: (A, D, and G) 10  $\mu$ m; (B) 2  $\mu$ m.

Table S1. **Integrin signaling network phosphoproteins and their phosphosites**

| Symbol       | Entrez gene name                                              | UniProt/Swiss 2D gelatin | 2D gelatin phospho-sites                         | UniProt/Swiss HDFC | HDFC phosphosites                                                    |
|--------------|---------------------------------------------------------------|--------------------------|--------------------------------------------------|--------------------|----------------------------------------------------------------------|
| 4EBP1        | Eukaryotic translation initiation factor 4E binding protein 1 | 4EBP1_HUMAN              | Y34, T37, T41, S44, T45, T46, T50, S65, T68, T70 | 4EBP1_HUMAN        | Y34, S35, T36, T37, T41, S44, T45, T46, T50, S65, T68, T70, T77, T82 |
| AKAP         | A kinase (PRKA) anchor protein 11                             | AKA11_HUMAN              | S1170, S1172                                     | AKA11_HUMAN        | S1170, S1172, T1174                                                  |
| AKAP         | A kinase (PRKA) anchor protein 2                              | AKAP2_HUMAN              | S121, S152, S154, S155, S158, S393, T399, S748   | AKAP2_HUMAN        | S152, S154, S159, S393, T399, S748                                   |
| ARHGAP17     | Rho GTPase-activating protein 17                              | RHG17_HUMAN              | T679                                             | –                  | –                                                                    |
| ARHGAP29     | Rho GTPase-activating protein 29                              | RHG29_HUMAN              | S930, S1029                                      | RHG29_HUMAN        | S930, S1029                                                          |
| ARHGAP35     | Rho GTPase-activating protein 35, p190A RhoGAP                | RHG35_HUMAN              | S1179                                            | RHG35_HUMAN        | S1179                                                                |
| ARHGAP5      | Rho GTPase-activating protein 5, p190B RhoGAP                 | –                        | –                                                | RHG05_HUMAN        | S1195                                                                |
| ARHGEF1      | Rho GEF 1                                                     | ARHG1_HUMAN              | S863                                             | ARHG1_HUMAN        | S863                                                                 |
| ARHGEF12     | Rho GEF 12                                                    | ARHGC_HUMAN              | S341, T736                                       | ARHGC_HUMAN        | T736                                                                 |
| ARHGEF18     | Rho/Rac GEF 18                                                | –                        | –                                                | ARHGI_HUMAN        | S1103                                                                |
| ARHGEF2      | Rho/Rac GEF 2; GEF-H1                                         | ARHG2_HUMAN              | S151, T152, T153, S174, T175, T695, S696, S886   | ARHG2_HUMAN        | S149, S151, T152, S174, T695, S696, S886                             |
| ARHGEF6      | Rac/Cdc42 GEF 6, $\alpha$ PIX                                 | ARHG6_HUMAN              | S488                                             | ARHG6_HUMAN        | S488                                                                 |
| BCAR1        | breast cancer anti-estrogen resistance 1, p130CAS             | BCAR1_HUMAN              | Y362                                             | –                  | –                                                                    |
| BCAR3        | breast cancer anti-estrogen resistance 3, AND34               | BCAR3_HUMAN              | S363                                             | –                  | –                                                                    |
| BORG2        | CDC42 effector protein (Rho GTPase binding) 3                 | BORG2_HUMAN              | S89, S108, T111, S115                            | BORG2_HUMAN        | S100, S108, S115                                                     |
| Caveolin     | caveolin 1, caveolae protein, 22 kD                           | CAV1_HUMAN               | S37                                              | CAV1_HUMAN         | S37                                                                  |
| Cavin1/PTRF  | Polymerase I and transcript release factor (PTRF)             | PTRF_HUMAN               | S169, T302                                       | PTRF_HUMAN         | S169, S300, T302                                                     |
| CD44         | CD44 molecule (Indian blood group)                            | CD44_HUMAN               | S704, S706                                       | CD44_HUMAN         | S706                                                                 |
| CIP4         | Cdc42-interacting protein 4                                   | CIP4_HUMAN               | S296                                             | CIP4_HUMAN         | S296                                                                 |
| Cortactin    | cortactin                                                     | SRC8_HUMAN               | T401, S405, T411, S417, S418, Y421               | SRC8_HUMAN         | T399, T401, S405, T411, S418, Y421                                   |
| CRKL         | v-crk sarcoma virus CT10 oncogene homologue (avian)-like      | CRKL_HUMAN               | Y207, S222                                       | –                  | –                                                                    |
| DIAP3        | diaphanous homologue 3 ( <i>Drosophila melanogaster</i> )     | DIAP3_HUMAN              | S1093                                            | –                  | –                                                                    |
| Dynamin2     | dynamin 2                                                     | DYN2_HUMAN               | T755, S764                                       | DYN2_HUMAN         | T743, S759                                                           |
| Ets          | v-ets erythroblastosis virus E26 oncogene homologue 1 (avian) | ETS1_HUMAN               | S282                                             | ETS1_HUMAN         | S282                                                                 |
| FAK          | PTK2 protein tyrosine kinase 2                                | FAK1_HUMAN               | S910                                             | FAK1_HUMAN         | S910                                                                 |
| Filamin A    | filamin A, $\alpha$                                           | FLNA_HUMAN               | S1084, S1459                                     | FLNA_HUMAN         | S1084, S1454, S1459                                                  |
| Filamin B    | filamin B, $\beta$                                            | FLNB_HUMAN               | S2478                                            | –                  | –                                                                    |
| Filamin C    | filamin C, $\gamma$                                           | FLNC_HUMAN               | S2233                                            | FLNC_HUMAN         | S2233                                                                |
| GIT          | G protein-coupled receptor kinase interacting ArfGAP 1        | GIT1_HUMAN               | S362                                             | GIT1_HUMAN         | S362, S592                                                           |
| GSK3 $\beta$ | glycogen synthase kinase 3 $\beta$                            | GSK3B_HUMAN              | T8, S9, Y216                                     | GSK3B_HUMAN        | S9, Y216                                                             |
| IRSp53       | BAI1-associated protein 2                                     | BAIP2_HUMAN              | S338, T340                                       | BAIP2_HUMAN        | T340, T455                                                           |
| Kindlin2     | fermitin family member 2                                      | –                        | –                                                | FERM2_HUMAN        | S159                                                                 |
| LIMA1        | LIM domain and actin binding protein                          | LIMA1_HUMAN              | S362, S365, S490                                 | LIMA1_HUMAN        | S362, S373, T487, S490, S604                                         |
| MAP2K2       | mitogen-activated protein kinase kinase 2, MEK2               | MP2K2_HUMAN              | S222, S226, T394, T396                           | MP2K2_HUMAN        | S222, S226, T394, T396                                               |
| MAP3K2       | mitogen-activated protein kinase kinase kinase 2, MEK1        | M3K2_HUMAN               | S164                                             | M3K2_HUMAN         | S164                                                                 |
| MAPK1        | mitogen-activated protein kinase 1, Erk2                      | MK01_HUMAN               | T185, Y187                                       | MK01_HUMAN         | T185, Y187                                                           |
| MAPK3        | mitogen-activated protein kinase 3, Erk1                      | MK03_HUMAN               | T202, Y204                                       | MK03_HUMAN         | T202                                                                 |

Table S1. **Integrin signaling network phosphoproteins and their phosphosites** (Continued)

| Symbol          | Entrez gene name                                                                              | UniProt/Swiss 2D gelatin | 2D gelatin phospho-sites   | UniProt/Swiss HDFC | HDFC phosphosites                  |
|-----------------|-----------------------------------------------------------------------------------------------|--------------------------|----------------------------|--------------------|------------------------------------|
| MLCP            | protein phosphatase 1, regulatory subunit 10; PPP1R10                                         | PP1RA_HUMAN              | S313                       | PP1RA_HUMAN        | S313                               |
| MLCP            | protein phosphatase 1, regulatory subunit 12A; PPP1R12A; myosin phosphatase target subunit 1  | MYPT1_HUMAN              | S422, T443, S445, Y446     | MYPT1_HUMAN        | S299, S422, T443, S445, Y446, S862 |
| MLCP            | protein phosphatase 1, regulatory (inhibitor) subunit 14B; PPP1R14B                           | PP14B_HUMAN              | S32                        | PP14B_HUMAN        | S32                                |
| MPRIP           | myosin phosphatase Rho interacting protein                                                    | MPRIP_HUMAN              | S619, S977, S980, S993     | MPRIP_HUMAN        | S540, S619, S977, S993             |
| MYL12A          | myosin, light chain 12A, regulatory, nonsarcomeric                                            | ML12A_HUMAN              | T18, S19                   | ML12A_HUMAN        | T18, S19                           |
| Myosin MYH10    | myosin, heavy chain 10, nonmuscle                                                             | MYH10_HUMAN              | S1956                      | –                  | –                                  |
| Myosin MYH9     | myosin, heavy chain 9, nonmuscle                                                              | MYH9_HUMAN               | S1943                      | MYH9_HUMAN         | S1943                              |
| NCK1            | noncatalytic region of tyrosine kinase (NCK) adaptor protein 1                                | NCK1_HUMAN               | S85                        | NCK1_HUMAN         | S85, S91                           |
| NF- $\kappa$ B  | nuclear factor of $\kappa$ light polypeptide gene enhancer in B-cells 1                       | –                        | –                          | NFKB1_HUMAN        | S907                               |
| p70RSK          | ribosomal protein S6 kinase, 70 kD, polypeptide 1                                             | KS6B1_BOVIN              | S447                       | KS6B1_BOVIN        | S447                               |
| p90RSK          | ribosomal protein S6 kinase, 90 kD, polypeptide 3                                             | KS6A3_HUMAN              | S227, T231                 | KS6A3_HUMAN        | S227, T231, T577                   |
| p90RSK          | ribosomal protein S6 kinase, 90 kD, polypeptide 4                                             | KS6A4_HUMAN              | S682, T687                 | KS6A4_HUMAN        | S347, S682, T687                   |
| PAK2            | p21 protein (Cdc42/Rac)-activated kinase 2                                                    | PAK2_HUMAN               | S141, T143                 | PAK2_HUMAN         | S141, T143                         |
| PAK4            | p21 protein (Cdc42/Rac)-activated kinase 4                                                    | PAK4_HUMAN               | S104, S181, T207, S474     | PAK4_HUMAN         | S181, T207, S474, T478             |
| PAR3            | par-3 partitioning defective 3 homologue ( <i>Caenorhabditis elegans</i> )                    | PARD3_HUMAN              | S144                       | PARD3_HUMAN        | S144                               |
| Parvin $\alpha$ | parvin, $\alpha$                                                                              | PARVA_HUMAN              | S14, S19                   | PARVA_HUMAN        | S10, S14, S19                      |
| Paxillin        | paxillin                                                                                      | PAXI_HUMAN               | S84, S85, S106, S303, S322 | PAXI_HUMAN         | S84, S85, S106, S244, S303, S322   |
| PKA             | protein kinase, cAMP-dependent, catalytic, $\beta$                                            | KAPCB_HUMAN              | T196, T198, T202           | KAPCB_HUMAN        | T196, T198                         |
| PKA             | protein kinase, AMP-activated, $\gamma$ 2 noncatalytic subunit                                | AAKG2_HUMAN              | S83, S196                  | AAKG2_HUMAN        | S196                               |
| PKA             | protein kinase, cAMP-dependent, regulatory, type I, $\alpha$ (tissue-specific extinguisher 1) | KAPO_HUMAN               | S87, S93                   | KAPO_HUMAN         | S87, S93                           |
| PKA             | protein kinase, cAMP-dependent, regulatory, type II, $\alpha$                                 | KAP2_HUMAN               | S109                       | KAP2_HUMAN         | S109                               |
| PKC             | protein kinase C, $\alpha$                                                                    | KPCA_HUMAN               | T495, T497, T501           | KPCA_HUMAN         | S226, T497, T501                   |
| PKC             | protein kinase C, $\delta$                                                                    | KPCD_HUMAN               | S506, T507                 | KPCD_HUMAN         | S506, T507                         |
| PKC             | protein kinase C, $\iota$                                                                     | KPCI_HUMAN               | T409, S411, T412, T564     | KPCI_HUMAN         | S411, T412, T564                   |
| PKN1            | protein kinase N1                                                                             | PKN1_HUMAN               | S773, T774, T778           | PKN1_HUMAN         | S773, T774, T778                   |
| PKN2            | protein kinase N2                                                                             | PKN2_HUMAN               | S815, T816, T820, T958     | PKN2_HUMAN         | T814, S815, T816, T820, T958       |
| PP2A            | protein phosphatase 2, regulatory subunit B', $\delta$                                        | 2A5D_HUMAN               | S573                       | 2A5D_HUMAN         | S573                               |
| Raf             | v-raf-1 murine leukemia viral oncogene homologue 1                                            | RAF1_HUMAN               | T258, S259, T260           | RAF1_HUMAN         | S257, T258, S259, T260, S642       |
| Ras             | related RAS viral (r-ras) oncogene homologue 2                                                | RRAS2_HUMAN              | S186                       | RRAS2_HUMAN        | S186                               |
| Rhotekin        | rhotekin                                                                                      | RTKN_HUMAN               | S520                       | RTKN_HUMAN         | S520                               |
| RPS6            | ribosomal protein S6                                                                          | RS6_HUMAN                | S236                       | RS6_HUMAN          | S236                               |
| Septin2         | septin 2                                                                                      | SEPT2_HUMAN              | S218                       | SEPT2_HUMAN        | S218                               |
| Septin9         | septin 9                                                                                      | SEPT9_HUMAN              | S30                        | SEPT9_HUMAN        | S30                                |
| SRF             | serum response factor (c-fos serum response element-binding transcription factor)             | SRF_HUMAN                | S224                       | SRF_HUMAN          | S224                               |

Table S1. **Integrin signaling network phosphoproteins and their phosphosites** (Continued)

| Symbol      | Entrez gene name                                                                 | UniProt/Swiss 2D gelatin | 2D gelatin phosphosites                                        | UniProt/Swiss HDFC | HDFC phosphosites                                               |
|-------------|----------------------------------------------------------------------------------|--------------------------|----------------------------------------------------------------|--------------------|-----------------------------------------------------------------|
| STAT1       | signal transducer and activator of transcription 1, 91 kD                        | STAT1_HUMAN              | S727                                                           | STAT1_HUMAN        | S727                                                            |
| STAT3       | signal transducer and activator of transcription 3 (acute-phase response factor) | STAT3_BOVIN              | S727                                                           | STAT3_BOVIN        | S727                                                            |
| Stathmin    | stathmin 1                                                                       | STMN1_HUMAN              | S16, S25, S38                                                  | STMN1_HUMAN        | S16, S25, S38                                                   |
| Supervillin | Supervillin                                                                      | SVIL_HUMAN               | S245, T852                                                     | SVIL_HUMAN         | S245, T852                                                      |
| Talin1      | talin 1                                                                          | TLN1_HUMAN               | S425                                                           | TLN1_HUMAN         | S425                                                            |
| TIAM1       | T-cell lymphoma invasion and metastasis 1                                        | –                        |                                                                | TIAM1_HUMAN        | S231                                                            |
| TIAM2       | T-cell lymphoma invasion and metastasis 2                                        | TIAM2_HUMAN              | S720                                                           | –                  |                                                                 |
| Tubulin     | tubulin, $\alpha$ 1c                                                             | TBA1C_HUMAN              | S488                                                           | TBA1C_HUMAN        | S48, T51                                                        |
| VASP        | vasodilator-stimulated phosphoprotein                                            | VASP_HUMAN               | S322, S323, S325, T328, T331                                   | –                  |                                                                 |
| Vimentin    | vimentin                                                                         | VIME_HUMAN               | T20, S39, S51, Y53, S55, S56, Y61, S73, S409, S412, S419, S420 | VIME_HUMAN         | S39, S42, Y53, S55, S56, S72, S73, S412, S419, S420, T426, S430 |
| Zyxin       | zyxin                                                                            | ZYX_HUMAN                | S143, S281, S308, S344                                         | ZYX_HUMAN          | S142, S143, S308, S344                                          |

Minus signs indicate that no phosphopeptides were detected for the protein.

Table S2. **List of +1 and +2 predicted fragment ions for the kindlin2 phosphopeptide KLDDQSpEDEALELEGLITPGSGSIYS SPGLYSK**

| b  | b ions               | b +2H                | b –NH <sub>3</sub> | b –H <sub>2</sub> O | AA                  | y ions               | y +2H              | y –NH <sub>3</sub> | y –H <sub>2</sub> O | y  |
|----|----------------------|----------------------|--------------------|---------------------|---------------------|----------------------|--------------------|--------------------|---------------------|----|
| 1  | 129.1 <sup>a</sup>   | 65.1                 | 112.1              |                     | K                   | 3,675.7              | 1,838.4            | 3,658.7            | 3,657.7             | 34 |
| 2  | 242.2                | 121.6                | 225.2              |                     | L                   | 3,547.6              | 1,774.3            | 3,530.6            | 3,529.6             | 33 |
| 3  | 357.2                | 179.1                | 340.2              | 339.2               | D                   | 3,434.5              | 1,717.8            | 3,417.5            | 3,416.5             | 32 |
| 4  | 472.2 <sup>a</sup>   | 236.6                | 455.2              | 454.2               | D                   | 3,319.5              | 1,660.3            | 3,302.5            | 3,301.5             | 31 |
| 5  | 600.3                | 300.7                | 583.3              | 582.3               | Q                   | 3,204.5              | 1,602.7            | 3,187.5            | 3,186.5             | 30 |
| 6  | 767.3                | 384.2                | 750.3              | 749.3               | S + 80 <sup>b</sup> | 3,076.4              | 1,538.7            | 3,059.4            | 3,058.4             | 29 |
| 7  | 896.3                | 448.7                | 879.3              | 878.3               | E                   | 2,909.4              | 1,455.2            | 2,892.4            | 2,891.4             | 28 |
| 8  | 1,011.4              | 506.2                | 994.3              | 993.4               | D                   | 2,780.4              | 1,390.7            | 2,763.4            | 2,762.4             | 27 |
| 9  | 1,140.4 <sup>a</sup> | 570.7                | 1,123.4            | 1,122.4             | E                   | 2,665.4              | 1,333.2            | 2,648.3            | 2,647.4             | 26 |
| 10 | 1,211.4 <sup>a</sup> | 606.2                | 1,194.4            | 1,193.4             | A                   | 2,536.3              | 1,268.7            | 2,519.3            | 2,518.3             | 25 |
| 11 | 1,324.5 <sup>a</sup> | 662.8                | 1,307.5            | 1,306.5             | L                   | 2,465.3              | 1,233.1            | 2,448.3            | 2,447.3             | 24 |
| 12 | 1,453.6 <sup>a</sup> | 727.3                | 1,436.5            | 1,435.6             | E                   | 2,352.2              | 1,176.6            | 2,335.2            | 2,334.2             | 23 |
| 13 | 1,566.7              | 783.8                | 1,549.6            | 1,548.6             | L                   | 2,223.2              | 1,112.1            | 2,206.1            | 2,205.1             | 22 |
| 14 | 1,695.7 <sup>a</sup> | 848.4                | 1,678.7            | 1,677.7             | E                   | 2,110.1              | 1,055.5            | 2,093.0            | 2,092.1             | 21 |
| 15 | 1,752.7              | 876.9                | 1,735.7            | 1,734.7             | G                   | 1,981.0              | 991.0              | 1,964.0            | 1,963.0             | 20 |
| 16 | 1,849.8              | 925.4                | 1,832.7            | 1,831.8             | P                   | 1,924.0              | 962.0              | 1,907.0            | 1,906.0             | 19 |
| 17 | 1,962.9              | 981.9                | 1,945.8            | 1,944.8             | L                   | 1,827.0              | 914.0              | 1,809.9            | 1,808.9             | 18 |
| 18 | 2,075.9              | 1,038.5              | 2,058.9            | 2,057.9             | I                   | 1,713.9 <sup>c</sup> | 857.4              | 1,696.8            | 1,695.9             | 17 |
| 19 | 2,177.0              | 1,089.0              | 2,160.0            | 2,159.0             | T                   | 1,600.8 <sup>c</sup> | 800.9              | 1,583.8            | 1,582.8             | 16 |
| 20 | 2,274.0              | 1,137.5              | 2,257.0            | 2,256.0             | P                   | 1,499.7 <sup>c</sup> | 750.4 <sup>c</sup> | 1,482.7            | 1,481.7             | 15 |
| 21 | 2,331.1              | 1,166.0              | 2,314.0            | 2,313.1             | G                   | 1,402.7 <sup>c</sup> | 701.8              | 1,385.7            | 1,384.7             | 14 |
| 22 | 2,418.1              | 1,209.6              | 2,401.1            | 2,400.1             | S                   | 1,345.7 <sup>c</sup> | 673.3              | 1,328.6            | 1,327.7             | 13 |
| 23 | 2,475.1              | 1,238.1              | 2,458.1            | 2,457.1             | G                   | 1,258.6              | 629.8              | 1,241.6            | 1,240.6             | 12 |
| 24 | 2,562.1              | 1,281.6              | 2,545.1            | 2,544.1             | S                   | 1,201.6 <sup>c</sup> | 601.3              | 1,184.6            | 1,183.6             | 11 |
| 25 | 2,675.2              | 1,338.1              | 2,658.2            | 2,657.2             | I                   | 1,114.6              | 557.8              | 1,097.6            | 1,096.6             | 10 |
| 26 | 2,838.3              | 1,419.7              | 2,821.3            | 2,820.3             | Y                   | 1,001.5 <sup>c</sup> | 501.3              | 984.5              | 983.5               | 9  |
| 27 | 2,925.3              | 1,463.2              | 2,908.3            | 2,907.3             | S                   | 838.4 <sup>c</sup>   | 419.7              | 821.4              | 820.4               | 8  |
| 28 | 3,012.4              | 1,506.7              | 2,995.3            | 2,994.4             | S                   | 751.4 <sup>c</sup>   | 376.2              | 734.4              | 733.4               | 7  |
| 29 | 3,109.4              | 1,555.2              | 3,092.4            | 3,091.4             | P                   | 664.4 <sup>c</sup>   | 332.7              | 647.3              | 646.4               | 6  |
| 30 | 3,166.4              | 1,583.7 <sup>a</sup> | 3,149.4            | 3,148.4             | G                   | 567.3                | 284.2              | 550.3              | 549.3               | 5  |
| 31 | 3,279.5              | 1,640.3              | 3,262.5            | 3,261.5             | L                   | 510.3 <sup>c</sup>   | 255.6              | 493.3              | 492.3               | 4  |
| 32 | 3,442.6              | 1,721.8              | 3,425.6            | 3,424.6             | Y                   | 397.2 <sup>c</sup>   | 199.1              | 380.2              | 379.2               | 3  |
| 33 | 3,529.6              | 1,765.3              | 3,512.6            | 3,511.6             | S                   | 234.1 <sup>c</sup>   | 117.6              | 217.1              | 216.1               | 2  |
| 34 | 3,675.7              | 1,838.4              | 3,658.7            | 3,657.7             | K                   | 147.1                | 74.1               | 130.1              |                     | 1  |

<sup>a</sup>Matched b fragment ion.

<sup>b</sup>Serine phosphorylation site.

<sup>c</sup>Matched y fragment ion.

Table S3. **List of siRNA sequences used in this paper**

| siRNA name  | Type            | siRNA sequence                                                                                |
|-------------|-----------------|-----------------------------------------------------------------------------------------------|
| Kindlin2    | Pool            | AAUGAAAUCUGGCUUCGUU; GAACUGAGUGUCCAUGUGA; CUACAUAUUUCUCUCAACA; GCCCAGGACUGUAUAGUAA            |
| Kindlin2    | Single duplexes | AAUGAAAUCUGGCUUCGUU; CUACAUAUUUCUCUCAACA                                                      |
| Talin 1     | Pool            | GAAGAUGGUUGGCGGCAUU; GUAGAGGACCUGACAACAA; UCAAUCAGCUCAUCACUAU; GAGAUGAGGAGUCUACUAU            |
| Talin1      | Single duplexes | GAAGAUGGUUGGCGGCAUU; GUAGAGGACCUGACAACAA                                                      |
| Filamin A   | Pool            | GCAGGAGGCUUGGCGAGUAU; GCACCCAGACCGUCAAUUA; GCACAUGUCCGUGUCCUA; GAAUGGCGUUUACCUGAUU            |
| Filamin A   | Single duplexes | GCACAUGUCCGUGUCCUA; GAAUGGCGUUUACCUGAUU                                                       |
| Filamin B   | Pool            | GCGAUGCAGUGAAGGAUUU; GCACGGUCACUGUUAGAU; CAAGGUAGCCAUCCUCAGA; UACAUCGAGUACCAUAAA              |
| Migfilin    | Pool            | GAAGAGGGUGGCAUCGUCU; GCAUUGGGGAUGAGAGCUU; CCAUGAAGAGGCAGUACCA; UGUACUGCCUGGACGACUU            |
| Migfilin    | Single duplexes | CCAUGAAGAGGCAGUACCA; UGUACUGCCUGGACGACUU                                                      |
| TIAM1       | Pool            | CAAAUUGCCAUAGCAACA; GAACCGAAGCUGUAAAGAA; GUAUAAAAGAUUGGUCCAAA; GCAGGCUACUGUCGGAUUU            |
| TIAM1       | Single duplexes | CAAAUUGCCAUAGCAACA; GCAGGCUACUGUCGGAUUU                                                       |
| TIAM2       | Pool            | GUGUAAGGAUCGCCUGGUA; GAGCACUUCUCCCGGGAAA; CGACCUAAAUUCUGUUCUA; GAACUUCAGGCGUCACAU             |
| TIAM2       | Single duplexes | GAGCACUUCUCCCGGGAAA; GUGUAAGGAUCGCCUGGUA                                                      |
| ARHGEF12    | Pool            | GAUCAAUUCUGUCAGAAA; GAAUAGAGACCUCUGUUU; GGACAUUGCCCUUUAGAA; GGCAACAUUUCCCAAGAU                |
| ARHGEF12    | Single duplexes | GAUCAAUUCUGUCAGAAA; GAAUAGAGACCUCUGUUU                                                        |
| ARHGEF18    | Pool            | GGACGCAACUCGGACCAAU; CACAACGCAUAACCAAAUA; GCAGUGACCGGAUUUAUGU; UCAGGGCGCUUGAAAGAU             |
| ARHGEF18    | Single duplexes | GGACGCAACUCGGACCAAU; UCAGGGCGCUUGAAAGAU                                                       |
| Paxillin    | Pool            | CAACUGGAAACCACACAUUU; GGACGUGGCACCCUGAACAUU; CCAAACGGCCUGUGUUCUUU; UGACGAAAGAGAAGCCUAAU       |
| Paxillin    | Single duplexes | CAACUGGAAACCACACAUUU; UGACGAAAGAGAAGCCUAAU                                                    |
| Rac1        | Pool            | GUGAUUUCAUAGCGAGUUU; GUAGUUCUCAGAUGCGUA; AUGAAAGUGUCACGGGUAA; GAACUGCUAUUUCUCUA               |
| PAK2        | Pool            | GAACUGAUCAUUACGAGA; ACAGUGGGCUCGAUUACUA; GAGCAGAGCAAACGCAGUA; GAAACUGGCCAAACCGUUA             |
| PAK2        | Single duplexes | GAAACUGGCCAAACCGUUA; GAGCAGAGCAAACGCAGUA                                                      |
| PAK4        | Pool            | GAGUAUCCCAUGAGCAGUU; GGAUAAUGGUGAUUGAGAU; CCAUGAAGAUGAUUCGGGA; GGGACUACCAGCACGAGAA            |
| PAK4        | Single duplexes | CCAUGAAGAUGAUUCGGGA; GGGACUACCAGCACGAGAA                                                      |
| N/S control | Pool            | ON-TARGET plus control nontargeting siRNA/Thermo Fisher Scientific catalog number D-001810-10 |
| N/S control | Single duplexes | ON-TARGET plus control nontargeting siRNA/Thermo Fisher Scientific catalog number D-001810-01 |

All sequences in the table are shown starting with 5' and ending with 3' ends. N/S, nonspecific.

Table S4. **List of primers used for constructing human kindlin2 cDNA.**

| Vector type  | Forward primer                                         | Reverse primer                                           |
|--------------|--------------------------------------------------------|----------------------------------------------------------|
| GFP          | GGATCCAGGAATGGTGAAGGCGAGGAGCTG                         | GAACTTGC GGCCGCTTTACTTGTACAGCTCGTC                       |
| WT           | GCTAGCGGCCACCATGGCTCTGGACGGGATAAGGATGCCA               | GGATCCCCTGAGTTACCCACCAACCACTGGTAAGTTTG                   |
| S159A        | AAGAAGCTAGATGACCAGGCTGAAGATGAGGCACTTGAATTA             | TAATTC AAGTGCCTCATCTTCAGCCTGGTCATCTAGCTTCTT              |
| S181A        | GGATCAGGAAGTATATATTCAGCGCCAGGACTGTATAGTAAACA           | TGTTTTACTATACAGTCCTGGCGCTGAATATATACTTCTGATCC             |
| S666A        | CGTGCAAAAGACCAAAACGAGGCATTAGATGAAGAGATGTTCTAC          | GTAGAACATCTCTTCATCTAATGCCTCGTTTGGTCTTTTGCACG             |
| S159E        | AAGAAGCTAGATGACCAGGAGGAAGATGAGGCACTTGAATTA             | TAATTC AAGTGCCTCATCTTCTCTGTCATCTAGCTTCTT                 |
| S181E        | GGATCAGGAAGTATATATTCAGAGCCAGGACTGTATAGTAAACA           | TGTTTTACTATACAGTCCTGGCTCTGAATATATACTTCTGATCC             |
| S666E        | CGTGCAAAAGACCAAAACGAGGAATTAGATGAAGAGATGTTCTAC          | GTAGAACATCTCTTCATCTAATTCCTCGTTTGGTCTTTTGCACG             |
| siRNA rescue | GTTGCAGAAAGCATGAACGAGATTGGCTACGATGTGACAATGAA<br>AAACAG | CTGTTTTTCATTGTCACATCGTAGCCAAATCTCGTTTCATGCCTTCT<br>GCAAC |

All sequences in the table are shown starting with 5' and ending with 3' ends.

**A ZIP file is provided that includes a Matlab code for extracting elastic modulus from indentation data; the code uses nonlinear least squares fit with the coordinates of the contact point and the elastic modulus as the fitting parameters.**

**Dataset 1 is provided as an Excel file with AFM data corresponding to Table 1.**
